# Supplementary material for: Systematic Degradation Rate Analysis of Surface-Functionalized Porous Silicon Nanoparticles
Source: MDPI journal article supplement (doi:10.3390/ma12040580), 2019-02-15
Supplement: s1 [file s1]

# Supplementary Materials: Systematic Degradation Rate Analysis of Surface-functionalized Porous Silicon Nanoparticles

Rae Hyung Kang <sup>1,†</sup>, Seo Hyeon Lee <sup>1,†</sup>, Sangrim Kang <sup>1,2,†</sup>, Jinyoung Kang <sup>3</sup>, Junho K Hur <sup>2,\*</sup> and Dokyoung Kim <sup>1,4,5,6,\*</sup>

**Table S1.** Media composition. Abbreviation: DMEM; Dulbecco's modified Eagle medium, LB; lysogeny broth, and BHI; brain heart infusion.

| Media       | DMEM                                                       | LB                                           | BHI                                                                                                       |
|-------------|------------------------------------------------------------|----------------------------------------------|-----------------------------------------------------------------------------------------------------------|
| Composition | 4.0 mM L-Glutamine<br>4500 mg/L Glucose<br>Sodium Pyruvate | Tryptone<br>Yeast Extract<br>Sodium Chloride | Calf Brain, Infusion<br>Beef Heart, Infusion<br>Proteose peptone<br>Sodium Chloride<br>Disodium Phosphate |
| pH          | 7.4                                                        | 7.0 ± 0.2                                    | 7.4 ± 0.2                                                                                                 |

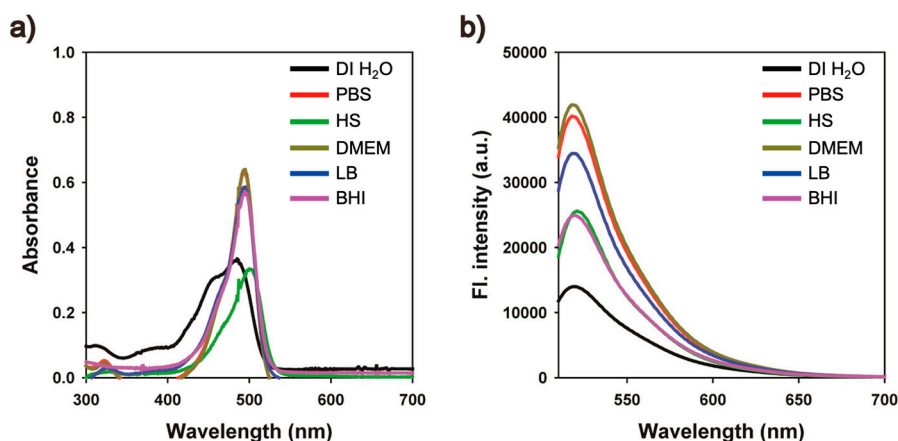

**Figure S1.** (a) UV/Vis absorption and (b) fluorescence spectra ( $\lambda_{\text{ex}}$ : 495 nm) of triethoxysilane-PEG-FITC (100 µg/mL) in deionized water (DI H<sub>2</sub>O), phosphate-buffered saline (PBS), human serum (HS), Dulbecco's modified Eagle medium (DMEM), lysogeny broth (LB), and brain heart infusion (BHI) at 25 °C.

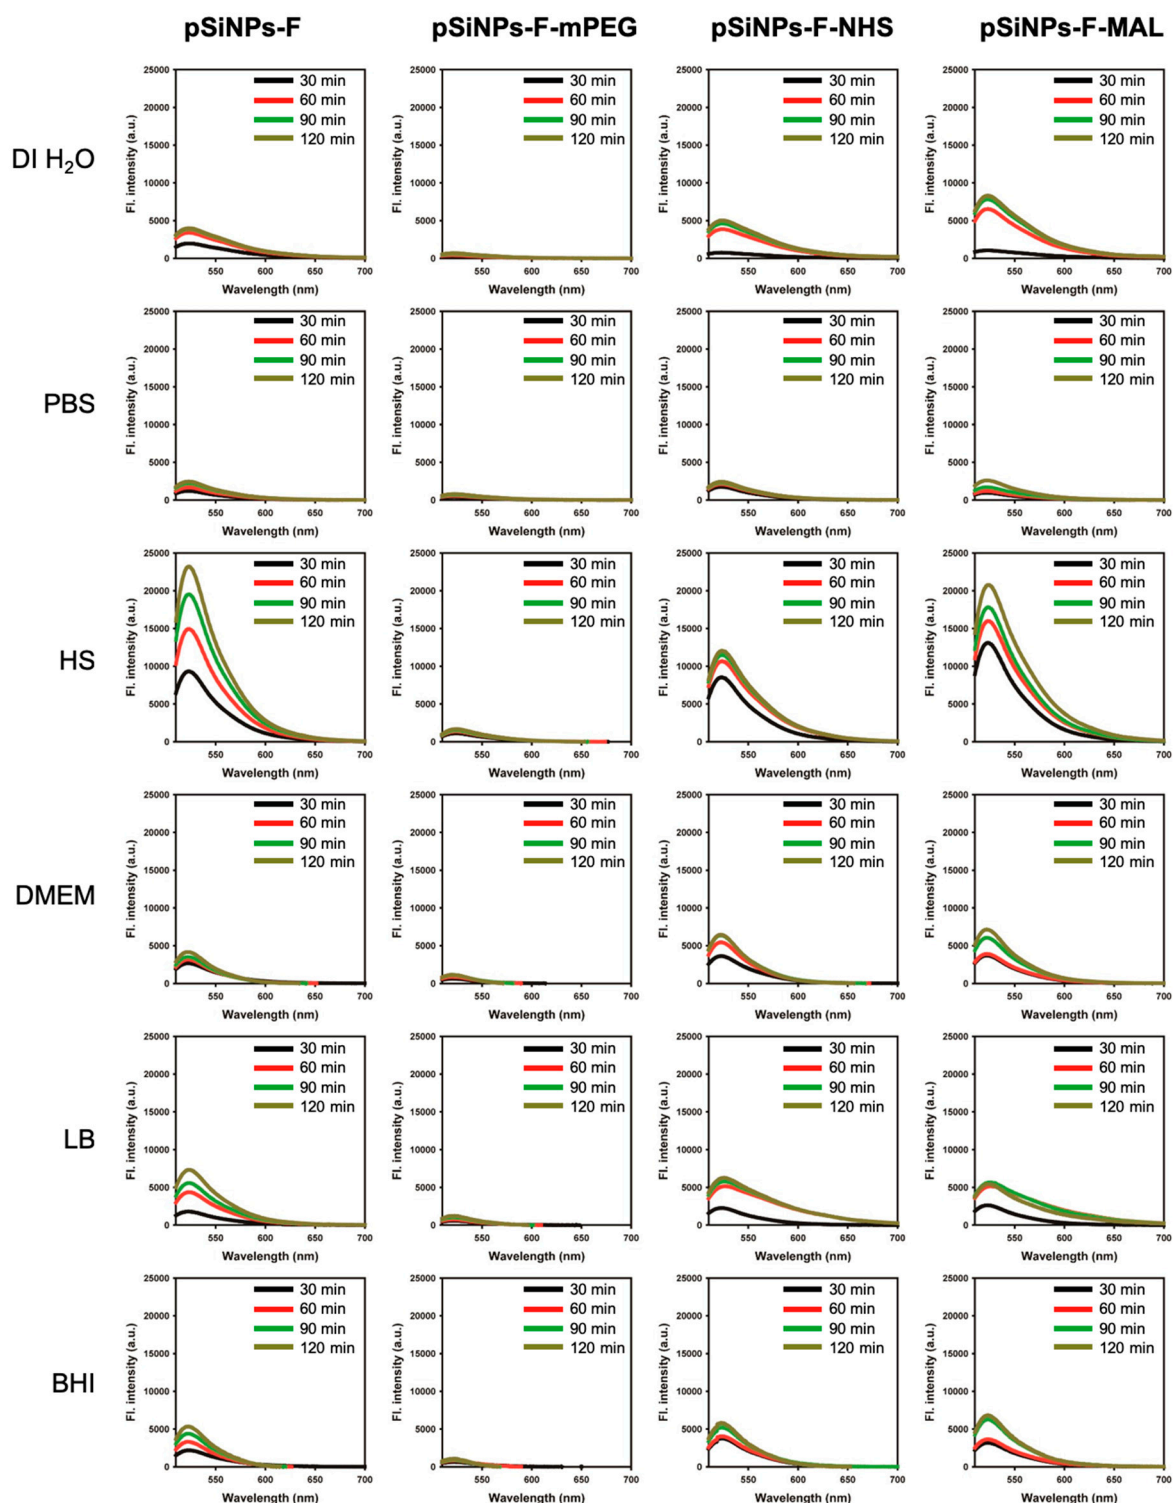

**Figure S2.** Time-dependent fluorescence spectra ( $\lambda_{\text{ex}}$ : 495 nm) of the supernatant from pSiNPs samples (100 µg/mL) in deionized water (DI H<sub>2</sub>O), phosphate-buffered saline (PBS), human serum (HS), Dulbecco's modified Eagle medium (DMEM), lysogeny broth (LB), and brain heart infusion (BHI) at 25 °C for 0–120 min. The supernatant was collected after the centrifugation (15,000 rpm, 15 min) at given time point.
